# Supplementary material
Source: PubMed Central journal article supplement (PMC2631444)

**Stereospecific Formation of Interstrand Carbinolamine DNA Crosslinks by Crotonaldehyde- and Acetaldehyde-Derived  $\alpha$ -CH<sub>3</sub>- $\gamma$ -OH-1,N<sup>2</sup>-Propano-2'-deoxyguanosine Adducts in the 5'-CpG-3' Sequence**

**Supporting Information**

**Revised Manuscript**

Young-Jin Cho, Hao Wang, Ivan D. Kozekov, Andrew J. Kurtz\*, Jaison Jacob<sup>§</sup>, Markus Voehler, Jarrod Smith, Thomas M. Harris, R. Stephen Lloyd<sup>‡</sup>, Carmelo J. Rizzo, and Michael P. Stone<sup>†</sup>

Department of Chemistry, Center in Molecular Toxicology, Vanderbilt-Ingram Cancer Center, Vanderbilt University, Nashville, Tennessee 37235

<sup>§</sup>Current Address for Jaison Jacob: Wyeth Pharmaceuticals, 35 Cambridge Park Drive, Cambridge, MA 02140

<sup>‡</sup>Center for Research on Occupational and Environmental Toxicology, Oregon Health and Science University, 3181 SW Sam Jackson Park Road, L606, Portland, OR 97239-3098

\*Current Address for Andrew J. Kurtz: Department of Human Biological Chemistry and Genetics, University of Texas Medical Branch, Galveston, Texas 77555-1068

<sup>†</sup>Author to whom correspondence should be addressed. Telephone 615-322-2589; FAX 615-322-7591; email michael.p.stone@vanderbilt.edu

Running Title: Crotonaldehyde Carbinolamine DNA Crosslinks

**Figure S1.** The parameterization of the carbinolamine and the pyrimidopurinone crosslinks for the AMBER 8.0 forcefield.

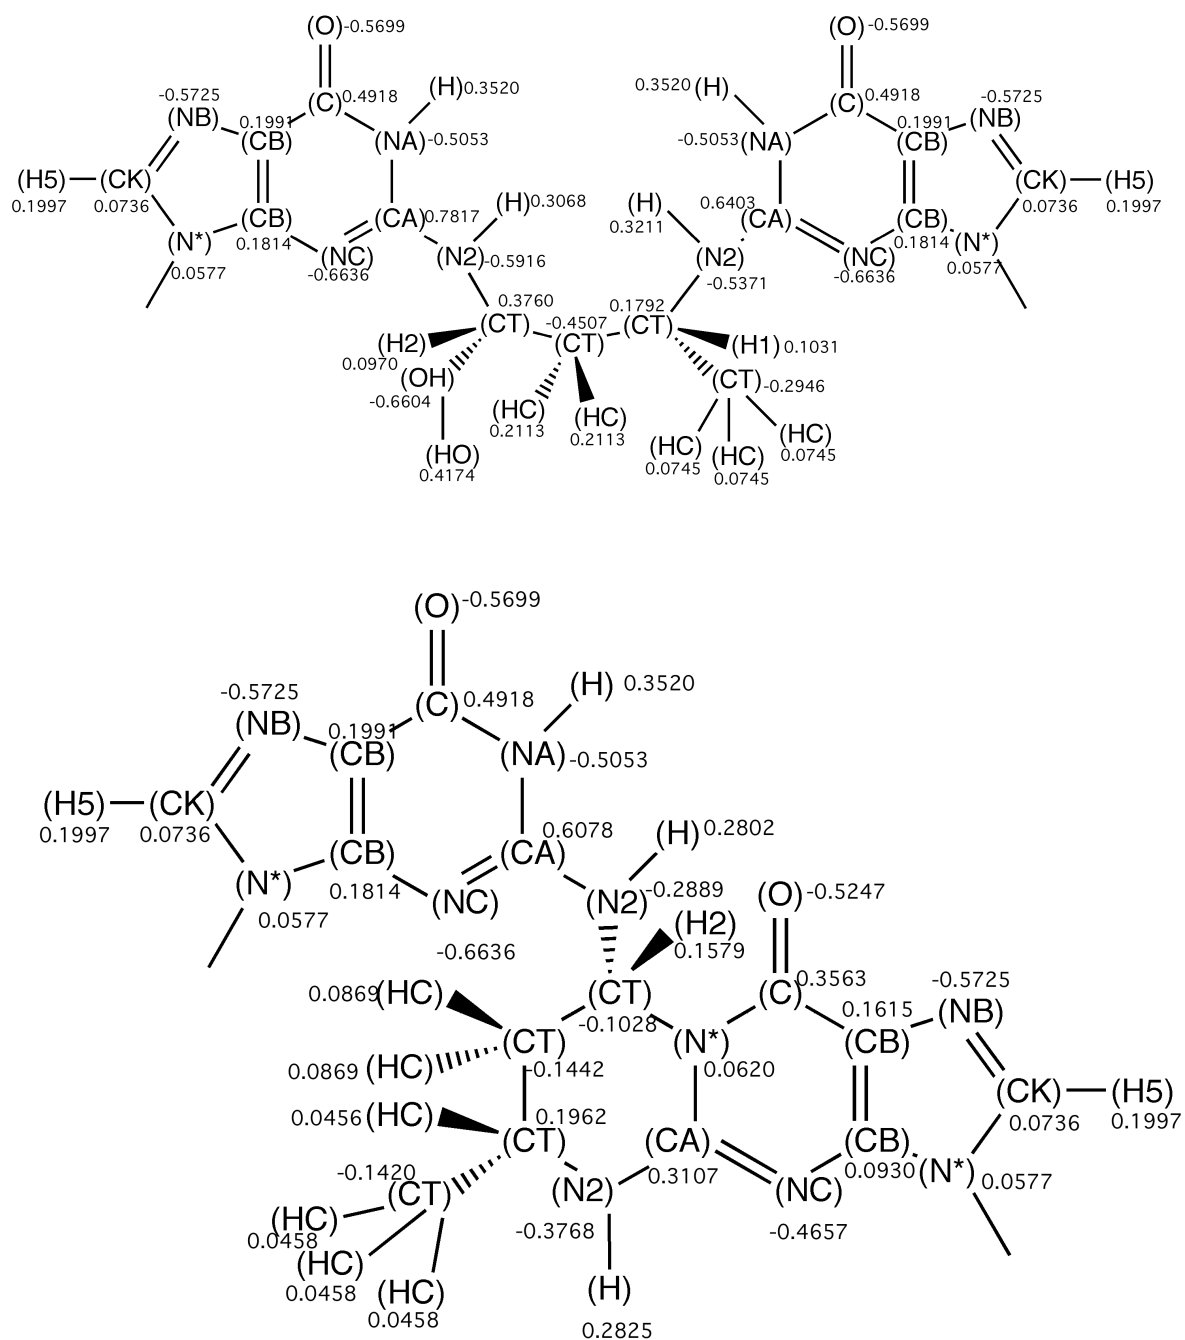

Supplement: NIHMS60885-supplement-si20051026_070.pdf [file NIHMS60885-supplement-si20051026_070.pdf]
